# Supplementary material
Source: publisher site journal article supplement (https://www.dovepress.com/article/349193)
Supplement: Supplementary file 1 [file get_supplementary_file.php]

Supplemental Table 1 Involved extranodal organs

| Involved organs | n  | %    |
|-----------------|----|------|
| Bone marrow     | 22 | 19.6 |
| Lung            | 5  | 4.5  |
| Liver           | 2  | 1.8  |

Supplemental Table 2 Complications

| Complication           | n  | %    |
|------------------------|----|------|
| Coronary heart disease | 2  | 1.8  |
| Diabetes               | 9  | 8.0  |
| Hypertension           | 18 | 16.1 |
| Autoimmune disease     | 1  | 0.9  |
| Chronic renal failure  | 1  | 0.9  |
| HBV infection          | 13 | 11.6 |

Supplemental Table 3 Comparison of baseline clinical characteristics according to the AMR, AMC, and ALC cutoff values

| Characteristics        | LMR $\leq$ 3.6<br>n=51 | LMR $>$ 3.6<br>n=61 | <i>P</i> | AMC $\leq$ 0.6*10 <sup>9</sup> /L<br>n=99 | AMC $>$ 0.6*10 <sup>9</sup> /L<br>n=13 | <i>P</i> | ALC $\leq$ 0.6*10 <sup>9</sup> /L<br>N=15 | ALC $>$ 0.6*10 <sup>9</sup> /L<br>n=97 | <i>P</i> |
|------------------------|------------------------|---------------------|----------|-------------------------------------------|----------------------------------------|----------|-------------------------------------------|----------------------------------------|----------|
| FLIPI                  |                        |                     | 0.349    |                                           |                                        | 0.036    |                                           |                                        | 0.211    |
| 0-1                    | 9 (11.5)               | 16 (13.5)           |          | 24 (22.1)                                 | 1 (2.9)                                |          | 1 (3.4)                                   | 24 (21.6)                              |          |
| 2                      | 16 (17)                | 21 (20)             |          | 35 (32.7)                                 | 2 (4.3)                                |          | 6 (5)                                     | 31 (32)                                |          |
| 3-5                    | 26 (22.5)              | 23 (26.5)           |          | 39 (43.3)                                 | 10 (5.7)                               |          | 8 (6.6)                                   | 41 (42.4)                              |          |
| FLIPI2                 |                        |                     | 0.627    |                                           |                                        | 0.336    |                                           |                                        | 0.236    |
| 0-1                    | 13 (11.8)              | 17 (18.2)           |          | 28 (27.6)                                 | 2 (2.4)                                |          | 1 (1.8)                                   | 29 (28.2)                              |          |
| 2                      | 5 (5.1)                | 8 (7.9)             |          | 11 (12)                                   | 2 (1)                                  |          | 2 (0.8)                                   | 11 (12.2)                              |          |
| 3-5                    | 2 (3.1)                | 6 (4.9)             |          | 8 (7.4)                                   | 0 (0.6)                                |          | 0 (0.5)                                   | 8 (7.5)                                |          |
| Grade                  |                        |                     | 0.373    |                                           |                                        | 0.284    |                                           |                                        | 0.947    |
| 1-2                    | 27 (29.1)              | 37 (34.9)           |          | 58 (55.8)                                 | 6 (8.2)                                |          | 7 (7.6)                                   | 57 (56.4)                              |          |
| 3                      | 19 (16.9)              | 18 (20.1)           |          | 30 (32.2)                                 | 7 (4.8)                                |          | 5 (4.4)                                   | 32 (32.6)                              |          |
| Ki67%                  |                        |                     | 0.529    |                                           |                                        | 0.253    |                                           |                                        | 0.253    |
| $\leq$ 50              | 32(33.3)               | 43 (41.7)           |          | 68 (65.9)                                 | 7 (9.1)                                |          | 7 (9.1)                                   | 68 (65.9)                              |          |
| $>$ 50                 | 12(10.7)               | 12 (13.3)           |          | 19 (21.1)                                 | 5 (2.9)                                |          | 5 (2.9)                                   | 19 (21.1)                              |          |
| Rituximab treatment    |                        |                     | 1.000    |                                           |                                        | 0.699    |                                           |                                        | 0.017    |
| Absence                | 9 (9.1)                | 11 (10.9)           |          | 17 (17.7)                                 | 3 (2.3)                                |          | 6 (2.7)                                   | 14 (17.3)                              |          |
| Presence               | 42 (41.9)              | 50 (50.1)           |          | 82 (81.3)                                 | 10 (10.7)                              |          | 9 (12.3)                                  | 83 (79.7)                              |          |
| Therapeutic effect     |                        |                     | 0.068    |                                           |                                        | 0.676    |                                           |                                        | 0.857    |
| CR                     | 29 (25.0)              | 9 (13.0)            |          | 50 (49.4)                                 | 25 (25.6)                              |          | 6 (5.3)                                   | 2 (2.7)                                |          |
| nCR                    | 27 (31.0)              | 20 (16.0)           |          | 6 (6.6)                                   | 4 (3.4)                                |          | 50 (50.7)                                 | 27 (26.3)                              |          |
| Extranodal involvement |                        |                     | 0.221    |                                           |                                        | 0.940    |                                           |                                        | 0.720    |
| Absence                | 35 (31.9)              | 35 (38.1)           |          | 62 (61.9)                                 | 8 (8.1)                                |          | 10 (9.4)                                  | 60 (60.6)                              |          |
| Presence               | 16 (19.1)              | 26 (22.9)           |          | 37 (37.1)                                 | 5 (4.9)                                |          | 5 (5.6)                                   | 37 (36.4)                              |          |
| Complication           |                        |                     | 0.873    |                                           |                                        | 0.910    |                                           |                                        | 0.627    |
| Absence                | 35 (34.6)              | 41 (41.4)           |          | 67 (67.2)                                 | 9 (8.8)                                |          | 11 (10.2)                                 | 65 (65.8)                              |          |
| Presence               | 16 (16.4)              | 20 (19.6)           |          | 32 (31.8)                                 | 4 (4.2)                                |          | 4 (4.8)                                   | 32 (31.2)                              |          |

Supplemental Table 4 Comparison of OS according to cutoff values for baseline LMR, AMC, and ALC

| OS          | LMR $\leq$ 3.6<br>n=44 | LMR>3.6<br>n=54 | AMC $\leq$ 0.6*10 <sup>9</sup> /L<br>n=91 | AMC>0.6*10 <sup>9</sup> /L<br>n=10 | ALC $\leq$ 0.6*10 <sup>9</sup> /L<br>N=13 | ALC>0.6*10 <sup>9</sup> /L<br>n=88 |
|-------------|------------------------|-----------------|-------------------------------------------|------------------------------------|-------------------------------------------|------------------------------------|
| 1 year, %   | 0.933                  | 1.000           | 0.978                                     | 0.900                              | 0.923                                     | 0.977                              |
| 3 years, %  | 0.800                  | 0.946           | 0.901                                     | 0.700                              | 0.692                                     | 0.909                              |
| 5 years, %  | 0.800                  | 0.946           | 0.901                                     | 0.700                              | 0.692                                     | 0.909                              |
| 7 years, %  | 0.747                  | 0.946           | 0.877                                     | 0.700                              | 0.593                                     | 0.909                              |
| 10 years, % | 0.597                  | 0.883           | 0.839                                     | 0.000                              | 0.593                                     | 0.759                              |
| Mean OS, m  | 98.2                   | 135.7           | 129.4                                     | 83.4                               | 96.3                                      | 128.1                              |
| 95% CI, m   | 84.4-112.0             | 125.5-145.9     | 120.0-138.8                               | 51.2-115.7                         | 65.8-126.9                                | 117.1-139.1                        |
| P value     | 0.014                  |                 | 0.012                                     |                                    | 0.023                                     |                                    |

Supplemental Table 5 Clinical characteristics according to POD24 status

|                  | POD24      | No POD24   | P     |
|------------------|------------|------------|-------|
| Patient number   | 27         | 77         |       |
| High-risk FLIPI  | 17 (63.0%) | 27 (35.1%) | 0.013 |
| High-risk FLIPI2 | 5 (18.5%)  | 3 (3.9%)   | 0.003 |

High-risk FLIPI refers to FLIPI score  $\geq 3$ ; high-risk FLIPI2 refers to FLIPI2  $\geq 3$ .
